# Supplementary material for: High Proton-Conductive and Temperature-Tolerant PVC-P4VP Membranes towards Medium-Temperature Water Electrolysis
Source: MDPI journal article supplement (doi:10.3390/membranes12040363), 2022-03-25
Supplement: s1 [file s1]

Supporting information

# High Proton-Conductive and Temperature-Tolerant PVC-P4VP Membranes Towards Medium-Temperature Water Electrolysis

Yichen Yin<sup>1,2</sup>, Yiming Ying<sup>1,3</sup>, Guojuan Liu<sup>1,2</sup>, Huiling Chen<sup>1,2</sup>, Jingrui Fan<sup>1,2</sup>, Zhi Li<sup>1,3</sup>, Chuhao Wang<sup>1,3</sup>, Zhuangyan Guo<sup>1,3</sup> and Gaofeng Zeng<sup>1,2,\*</sup>

<sup>1</sup> CAS Key Laboratory of Low-carbon Conversion Science and Engineering, Shanghai Advanced Research Institute, Chinese Academy of Sciences, Shanghai 201210, China

<sup>2</sup> School of Chemical Engineering, University of Chinese Academy of Sciences, Beijing 100049, China

<sup>3</sup> School of Physical Science and Technology, ShanghaiTech University, Shanghai 201210, China

\* Correspondence: zenggf@sari.ac.cn

## Figures

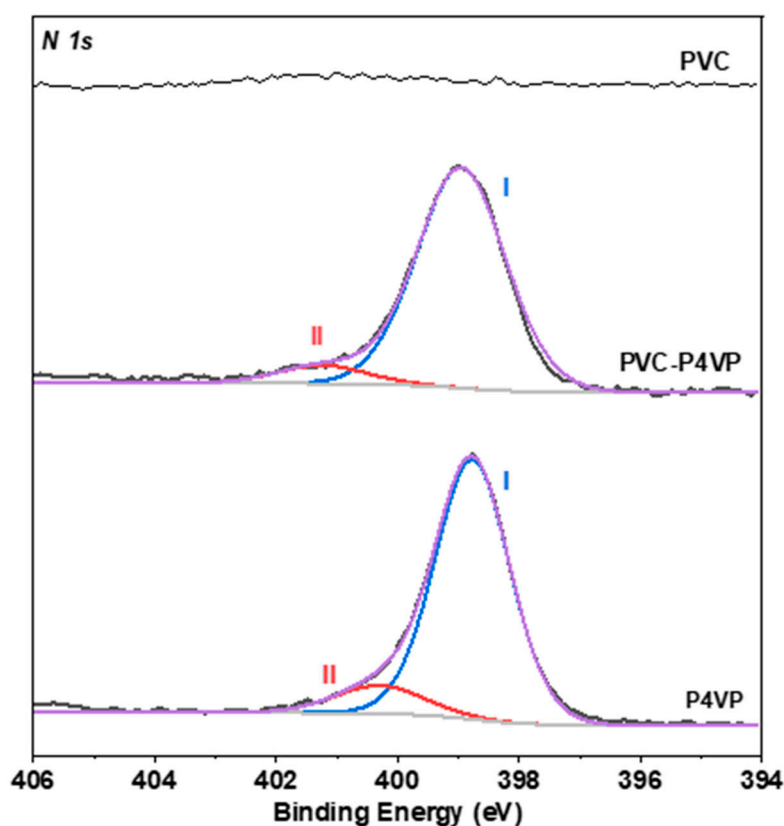

Figure S1. XPS N 1s spectra of PVC, PVC-P4VP and P4VP samples.

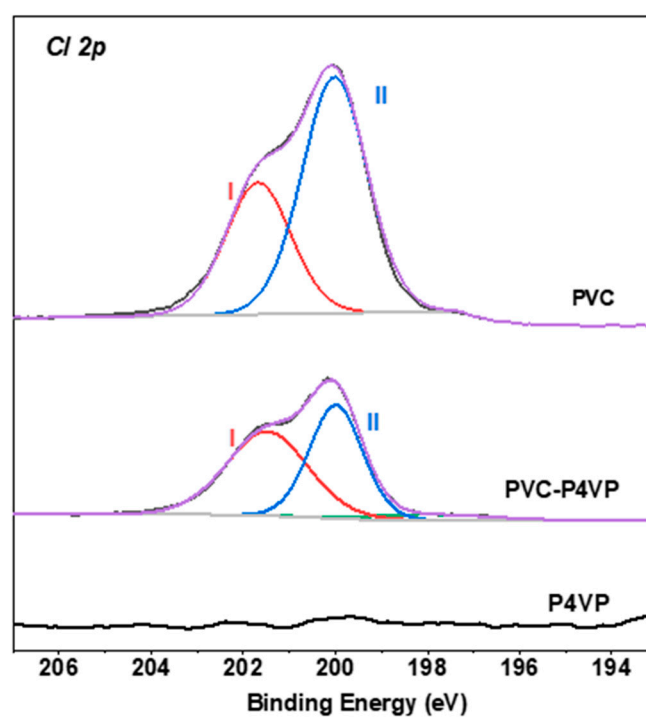

Figure S2. XPS Cl 2p spectra of PVC, PVC-P4VP and P4VP samples.

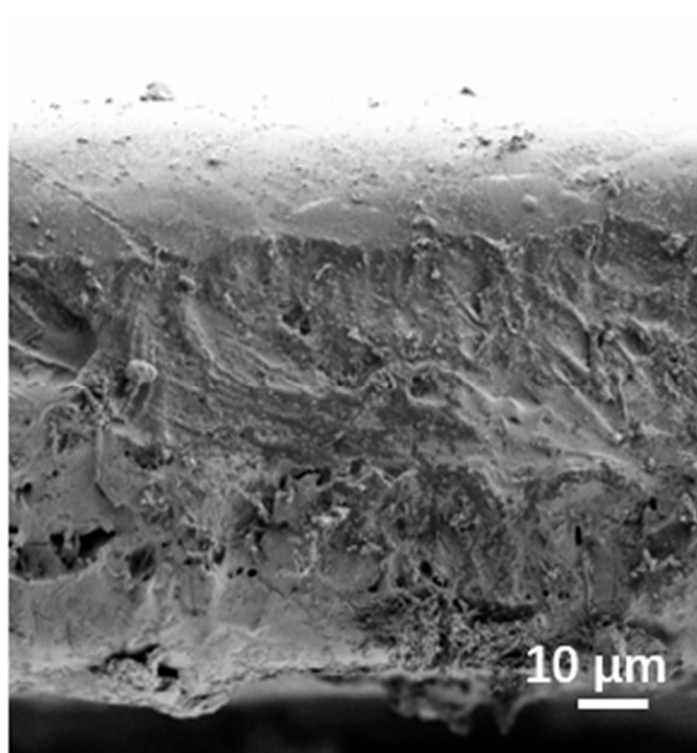

Figure S3. SEM cross-sectional view of PVC membrane.

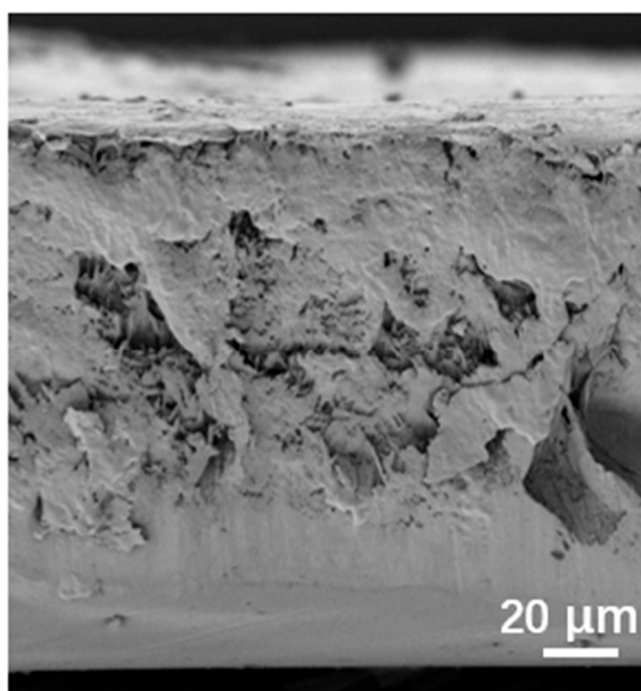

**Figure S4.** SEM cross-sectional view of P4VP membrane.

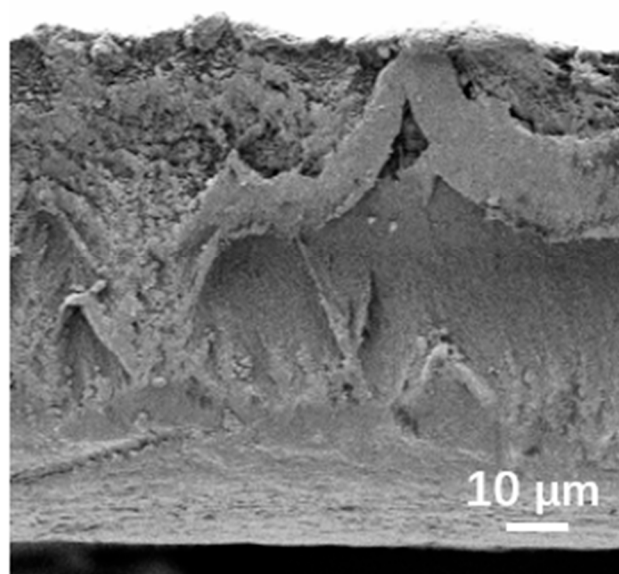

**Figure S5.** SEM cross-sectional view of PVC-P4VP membrane.

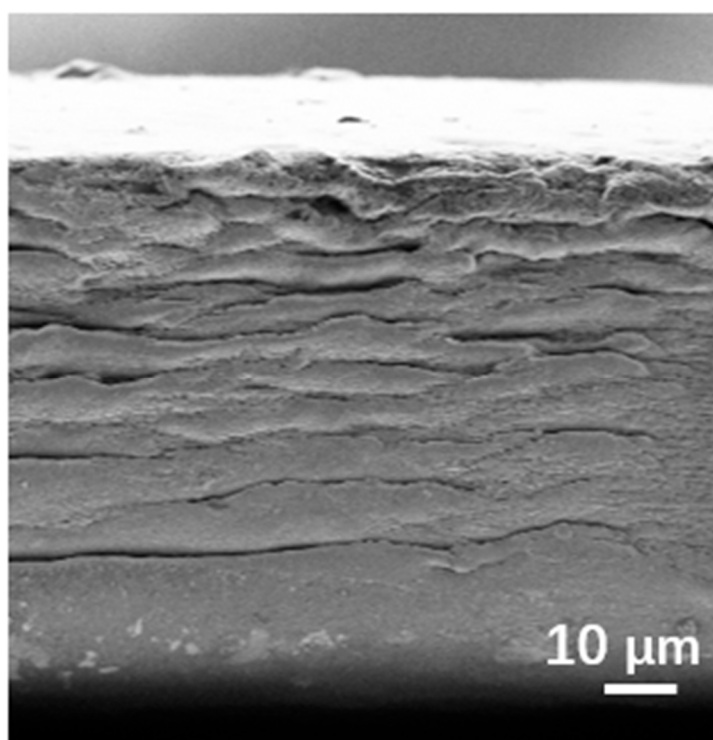

Figure S6. SEM cross-sectional view of PVC-P4VP/PA membrane.

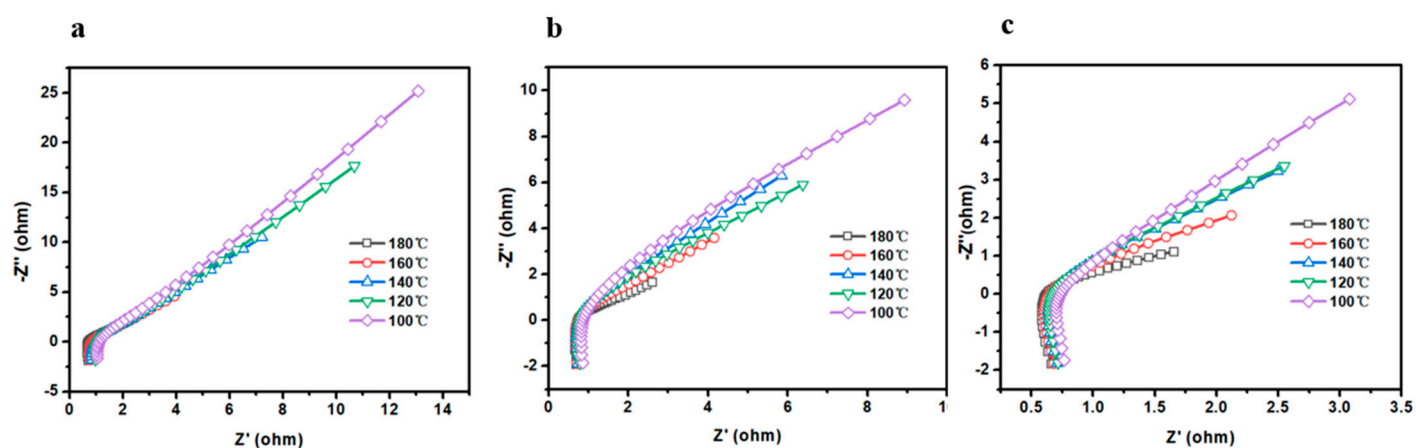

Figure S7. Nyquist plots of (a) PVC-P4VP(1:1)/PA, (b) PVC-P4VP (1:1.5)/PA, (c) PVC-P4VP(1:2)/PA at 100–180 °C.

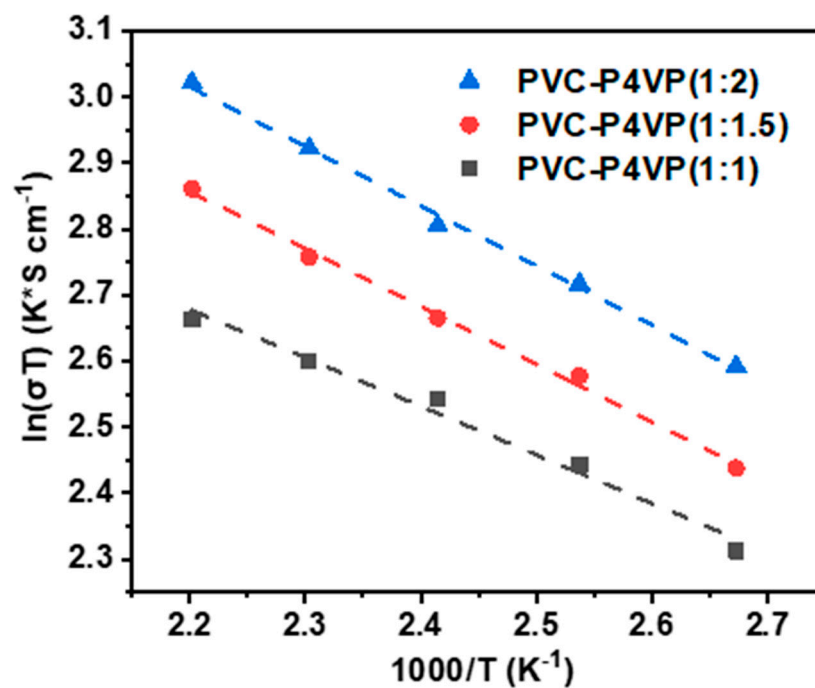

Figure S8. Temperature dependence of conductivity with PVC-P4VP membranes.

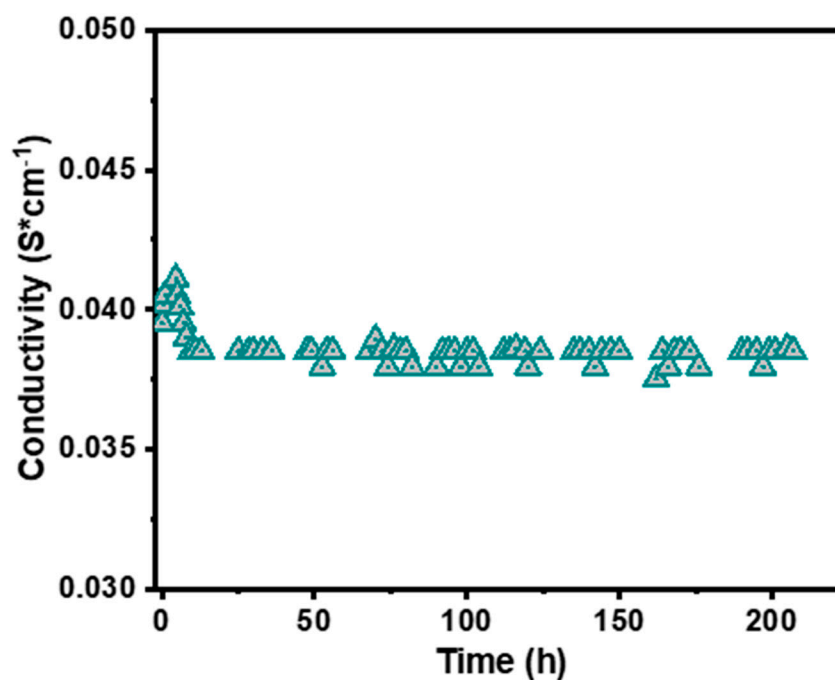

Figure S9. Stability of proton conductivity of PVC-P4VP(1:2)/PA membrane at 140°C.

## Tables

Table S1. The thickness and surface area of membranes.

| Membrane        | Area (cm <sup>2</sup> ) | Thickness (μm) |
|-----------------|-------------------------|----------------|
| PVC-P4VP(1:1)   | 0.91                    | 230            |
| PVC-P4VP(1:1.5) | 0.95                    | 270            |
| PVC-P4VP(1:2)   | 1.08                    | 300            |

**Table S2.** Stress-strain parameter for PVC, P4VP, PVC-P4VP(1/X) and PVC-P4VP(1/X)/PA membranes.

|         | Elasticity Modulus | Elongation<br>at break | Tensile stress<br>at break | Tensile strength |
|---------|--------------------|------------------------|----------------------------|------------------|
|         | MPa                | %                      | MPa                        | MPa              |
| P4VP    | 953.94             | 6.67                   | 8.01                       | 18.76            |
| 1/1     | 996.21             | 9                      | 17.71                      | 43.76            |
| 1/1.5   | 764.64             | 8.33                   | 15.04                      | 33.91            |
| 1/2     | 360.5              | 10                     | 9.27                       | 16.19            |
| 1/1 PA  | 11.02              | 116.05                 | 1.49                       | 2.54             |
| 1/1.5PA | 3.93               | 104.55                 | 1.3                        | 1.63             |
| 1/2PA   | 1.92               | 94.94                  | 0.46                       | 1.05             |
| PVC     | 1965.11            | 15.16                  | 42.39                      | 100.45           |
